# Supplementary material for: Stability of mental motor-imagery classification in EEG depends on the choice of classifier model and experiment design, but not on signal preprocessing
Source: PubMed Central journal article supplement (PMC10169631; doi:10.3389/fncom.2023.1142948), 2023-04-26
Supplement: Data_Sheet_1.pdf [file Data_Sheet_1.pdf]

## Supplementary Material

### 1 SUPPLEMENTARY DATA

$$\text{Accuracy} = \frac{\text{TruePositives} + \text{TrueNegatives}}{\text{TruePositives} + \text{TrueNegatives} + \text{FalsePositives} + \text{FalseNegatives}} \quad (\text{S1})$$

$$\text{F1} = 2 \cdot \frac{2 \cdot \text{TruePositives}}{2 \cdot \text{TruePositives} + \text{FalsePositives} + \text{FalseNegatives}} \quad (\text{S2})$$

$$\text{Precision} = \frac{\text{TruePositives}}{\text{TruePositives} + \text{FalsePositives}} \quad (\text{S3})$$

$$\text{Sensitivity} = \frac{\text{TruePositives}}{\text{TruePositives} + \text{FalseNegatives}} \quad (\text{S4})$$

$$\text{Specificity} = \frac{\text{TrueNegatives}}{\text{TrueNegatives} + \text{FalsePositives}} \quad (\text{S5})$$

**Supplementary Data S1-S5** Formulae used to calculate participant performance scores (accuracy and F1) and model characteristics (sensitivity and specificity).

## 2 SUPPLEMENTARY TABLES AND FIGURES

### 2.1 Tables

**Table S1.** Overview of EEG features per dataset. ICA = Independent Component Analysis, MA = Motor Area, MAN = Manual Artifact Detection, ROI = Region of Interest, WB = Whole-Brain Area, Channels = number of channels in the dataset, trials = number of trials in the complete dataset, 'Mental MI' trials = number of trials in the Motor Imagery condition, 'resting-state' trials = number of trials in the resting-state condition.

| Participant | ROI | Cleaning | Channels | Trials | 'Mental MI' trials | 'resting-state' trials |
|-------------|-----|----------|----------|--------|--------------------|------------------------|
| P1          | MA  | ICA      | 33       | 118    | 59                 | 59                     |
| P2          | MA  | ICA      | 29       | 94     | 52                 | 42                     |
| P3          | MA  | ICA      | 23       | 113    | 59                 | 54                     |
| P4          | MA  | ICA      | 27       | 104    | 47                 | 57                     |
| P5          | MA  | ICA      | 33       | 118    | 59                 | 59                     |
| P6          | MA  | ICA      | 29       | 111    | 53                 | 58                     |
| P7          | MA  | ICA      | 23       | 108    | 50                 | 58                     |
| P8          | MA  | ICA      | 28       | 108    | 57                 | 51                     |
| P1          | MA  | MAN      | 33       | 118    | 59                 | 59                     |
| P2          | MA  | MAN      | 31       | 108    | 55                 | 53                     |
| P3          | MA  | MAN      | 31       | 115    | 59                 | 56                     |
| P4          | MA  | MAN      | 28       | 114    | 54                 | 60                     |
| P5          | MA  | MAN      | 33       | 120    | 60                 | 60                     |
| P6          | MA  | MAN      | 30       | 115    | 57                 | 58                     |
| P7          | MA  | MAN      | 30       | 105    | 49                 | 56                     |
| P8          | MA  | MAN      | NA       | NA     | NA                 | NA                     |
| P1          | WB  | ICA      | 157      | 109    | 56                 | 53                     |
| P2          | WB  | ICA      | 156      | 95     | 53                 | 42                     |
| P3          | WB  | ICA      | 155      | 114    | 55                 | 59                     |
| P4          | WB  | ICA      | 160      | 105    | 51                 | 54                     |
| P5          | WB  | ICA      | 165      | 105    | 53                 | 52                     |
| P6          | WB  | ICA      | 160      | 105    | 52                 | 53                     |
| P7          | WB  | ICA      | 168      | 98     | 46                 | 52                     |
| P8          | WB  | ICA      | 171      | 101    | 60                 | 41                     |
| P1          | WB  | MAN      | 158      | 112    | 56                 | 56                     |
| P2          | WB  | MAN      | 159      | 106    | 54                 | 52                     |
| P3          | WB  | MAN      | 152      | 110    | 54                 | 56                     |
| P4          | WB  | MAN      | 152      | 110    | 55                 | 55                     |
| P5          | WB  | MAN      | 168      | 112    | 57                 | 55                     |
| P6          | WB  | MAN      | 159      | 114    | 56                 | 58                     |
| P7          | WB  | MAN      | 168      | 107    | 49                 | 58                     |
| P8          | WB  | MAN      | NA       | NA     | NA                 | NA                     |

**Table S2.** Representation of block order configurations for all participants. Every participant was presented six blocks in randomized order of which three blocks were 'mental MI' and 'resting-state', respectively.

| Participant | Block 1       | Block 2       | Block 3   | Block 4       | Block 5       | Block 6       |
|-------------|---------------|---------------|-----------|---------------|---------------|---------------|
| P1          | Mental MI     | Mental MI     | Mental MI | resting-state | resting-state | resting-state |
| P2          | Mental MI     | Mental MI     | Mental MI | resting-state | resting-state | resting-state |
| P3          | resting-state | Mental MI     | Mental MI | Mental MI     | resting-state | resting-state |
| P4          | resting-state | resting-state | Mental MI | Mental MI     | Mental MI     | resting-state |
| P5          | Mental MI     | resting-state | Mental MI | Mental MI     | resting-state | resting-state |
| P6          | resting-state | resting-state | Mental MI | Mental MI     | resting-state | Mental MI     |
| P7          | resting-state | Mental MI     | Mental MI | resting-state | Mental MI     | resting-state |
| P8          | resting-state | resting-state | Mental MI | Mental MI     | resting-state | Mental MI     |

**Table S3.** Combinations of experimental settings for the analyses with all six blocks. Manual = manual artifact cleaning, ICA = Independent Component Analysis, SVM = support vector machine, KNN = k-nearest-neighbors.

| Electrode set         | motor area            | whole-brain           |
|-----------------------|-----------------------|-----------------------|
| Artifact correction   | manual / ICA + manual | manual / ICA + manual |
| Folds crossvalidation | 10                    | 10                    |
| Crossvalidation model | SVM / KNN             | SVM / KNN             |

**Table S4.** Variation of hyperparameters in the support vector machine (SVM) model for single-subject classification. F1 scores (participant performance) are given for all hyperparameter constellations as mean and standard deviation (SD) across all participants. For every region of interest (ROI) and artifact cleaning method the best mean F1 score is written in bold letters. As 10 folds had the best mean F1 score in three out of four constellations, 10 folds were chosen for all classifiers in the single-subject classification. MAN = manual artifact cleaning, ICA = Independent Component Analysis.

| ROI         | Cleaning | Cross-validation folds | Mean               | SD          |
|-------------|----------|------------------------|--------------------|-------------|
| Motor Area  | ICA      | 5                      | 0,653144965        | 0,150227239 |
|             |          | 10                     | <b>0,70425</b>     | 0,132615751 |
|             |          | 20                     | 0,654262723        | 0,147902019 |
|             | MAN      | 5                      | 0,692541168        | 0,168702279 |
|             |          | 10                     | <b>0,726342857</b> | 0,132484391 |
|             |          | 20                     | 0,693620598        | 0,169325348 |
| Whole Brain | ICA      | 5                      | 0,686124241        | 0,162987705 |
|             |          | 10                     | <b>0,7041</b>      | 0,144225899 |
|             |          | 20                     | 0,68467977         | 0,150478393 |
|             | MAN      | 5                      | <b>0,692944757</b> | 0,140769781 |
|             |          | 10                     | 0,664371429        | 0,180672654 |
|             |          | 20                     | 0,685844445        | 0,148044121 |

**Table S5.** Variation of hyperparameters in the k-nearest-neighbors (KNN) model for single-subject classification. F1 scores (participant performance) are given for all hyperparameter constellations as mean and standard deviation (SD) across all participants. For every region of interest (ROI) and artifact cleaning method the best mean F1 score is written in bold letters. As 10 folds had the best mean F1 score in most of the constellations (8/20), 10 folds were chosen for all classifiers in the single-subject classification. MAN = manual artifact cleaning, ICA = Independent Component Analysis.

| ROI         | Cleaning | neighbors | Cross-validation folds | Mean               | SD          |
|-------------|----------|-----------|------------------------|--------------------|-------------|
| Motor Area  | ICA      | 1         | 5                      | 0,575661422        | 0,135838618 |
|             |          |           | 10                     | 0,575681382        | 0,128865897 |
|             |          |           | 20                     | <b>0,575690575</b> | 0,129826028 |
|             |          | 3         | 5                      | 0,562989225        | 0,129166804 |
|             |          |           | 10                     | <b>0,572544997</b> | 0,128265611 |
|             |          |           | 20                     | 0,567537988        | 0,130933239 |
|             |          | 5         | 5                      | <b>0,575598887</b> | 0,141290825 |
|             |          |           | 10                     | 0,56268981         | 0,14439144  |
|             |          |           | 20                     | 0,570812667        | 0,140463773 |
|             | 10       | 5         | 0,595514043            | 0,128916054        |             |
|             |          | 10        | <b>0,6068125</b>       | 0,145919125        |             |
|             |          | 20        | 0,588973501            | 0,119367838        |             |
|             | 15       | 5         | <b>0,545127932</b>     | 0,170497213        |             |
|             |          | 10        | 0,539024101            | 0,160827297        |             |
|             |          | 20        | 0,540159148            | 0,152641091        |             |
| Motor Area  | MAN      | 1         | 5                      | <b>0,602496623</b> | 0,09960511  |
|             |          |           | 10                     | 0,600567052        | 0,108615378 |
|             |          |           | 20                     | 0,599503768        | 0,103370763 |
|             |          | 3         | 5                      | 0,580473935        | 0,114018392 |
|             |          |           | 10                     | 0,576699941        | 0,115092606 |
|             |          |           | 20                     | <b>0,587482865</b> | 0,115238457 |
|             |          | 5         | 5                      | 0,556072924        | 0,128570403 |
|             |          |           | 10                     | <b>0,557279733</b> | 0,136412042 |
|             |          |           | 20                     | 0,555336644        | 0,136890446 |
|             | 10       | 5         | 0,551317559            | 0,135540492        |             |
|             |          | 10        | <b>0,594728571</b>     | 0,107777293        |             |
|             |          | 20        | 0,560101257            | 0,122363598        |             |
|             | 15       | 5         | 0,507884135            | 0,17523686         |             |
|             |          | 10        | <b>0,514387731</b>     | 0,177110627        |             |
|             |          | 20        | 0,510527947            | 0,181701239        |             |
| Whole Brain | ICA      | 1         | 5                      | <b>0,606572065</b> | 0,107967896 |
|             |          |           | 10                     | 0,602156743        | 0,103850337 |
|             |          |           | 20                     | 0,596859843        | 0,104433954 |
|             |          | 3         | 5                      | 0,580535769        | 0,134377486 |
|             |          |           | 10                     | 0,580890481        | 0,134326281 |
|             |          |           | 20                     | <b>0,582444919</b> | 0,131191129 |
|             |          | 5         | 5                      | 0,584551852        | 0,146577952 |
|             |          |           | 10                     | 0,582939659        | 0,137095183 |
|             |          |           | 20                     | <b>0,585487041</b> | 0,141579235 |
|             | 10       | 5         | 0,582783017            | 0,125719356        |             |
|             |          | 10        | <b>0,6007</b>          | 0,135895456        |             |
|             |          | 20        | 0,594997898            | 0,127251571        |             |
|             | 15       | 5         | <b>0,561417345</b>     | 0,167667908        |             |
|             |          | 10        | 0,558915662            | 0,189030948        |             |
|             |          | 20        | 0,555022256            | 0,181582802        |             |
| Whole Brain | MAN      | 1         | 5                      | 0,612121551        | 0,106088799 |
|             |          |           | 10                     | 0,611229392        | 0,103053558 |
|             |          |           | 20                     | <b>0,61277809</b>  | 0,107838232 |
|             |          | 3         | 5                      | 0,60039421         | 0,079942713 |
|             |          |           | 10                     | 0,602460507        | 0,088581883 |
|             |          |           | 20                     | <b>0,609024033</b> | 0,088796169 |
|             |          | 5         | 5                      | 0,596724241        | 0,095343586 |
|             |          |           | 10                     | 0,602878207        | 0,090790076 |
|             |          |           | 20                     | <b>0,611147095</b> | 0,100768171 |
|             | 10       | 5         | 0,597677477            | 0,09572731         |             |
|             |          | 10        | <b>0,602771429</b>     | 0,094412162        |             |
|             |          | 20        | 0,597860553            | 0,1028744          |             |
|             | 15       | 5         | 0,564865707            | 0,127951052        |             |
|             |          | 10        | <b>0,571781849</b>     | 0,124851302        |             |
|             |          | 20        | 0,569888082            | 0,125693992        |             |
